# Supplementary material
Source: Springer Nature journal article supplement (https://www.springermedizin.de/resource/supplementary/12885_2008_1191_MOESM3_ESM.pdf/9471360)

**A**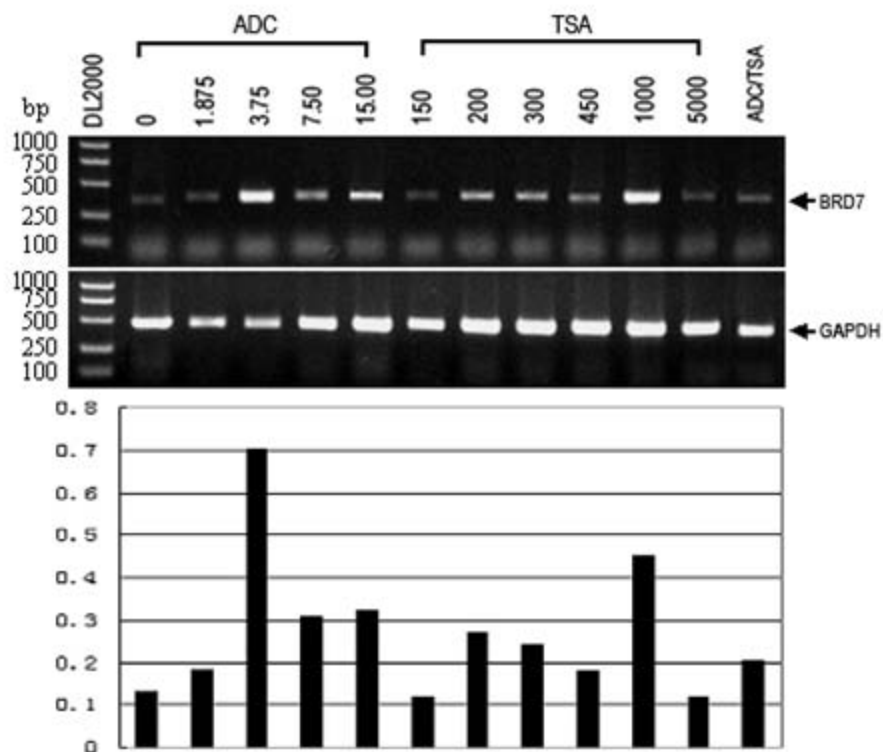**B**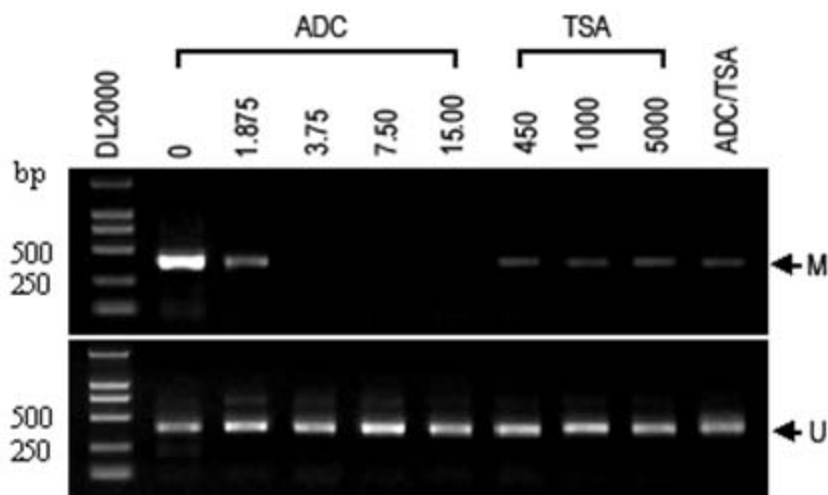

Supplement: MOESM3 [file 9471360]
